# Supplementary material for: Epidemiology and outcome analysis of 6325 burn patients: a five-year retrospective study in a major burn center in Southwest China
Source: PubMed Central journal article supplement (PMC5382583; doi:10.1038/srep46066), 2017-04-06
Supplement: srep46066-s1.pdf [file srep46066-s1.pdf]

# **Epidemiology and outcome analysis of 6325 burn patients: a five-year retrospective study in a major burn center in Southwest China**

Haisheng Li<sup>1</sup>, Zhihui Yao<sup>1,2</sup>, Jianglin Tan<sup>1</sup>, Junyi Zhou<sup>1</sup>, Yi Li<sup>1</sup>, Jun Wu<sup>1</sup>, Gaoxing Luo<sup>1</sup>

<sup>1</sup>Institute of Burn Research, State Key Laboratory of Trauma, Burn and Combined Injury, Southwest Hospital, Third Military Medical University, Chongqing, China. <sup>2</sup>People's Liberation Army Hospital 59, Kaiyuan, Yunnan Province, China.

## **Supplementary Figures and Tables**

## Supplementary Figures

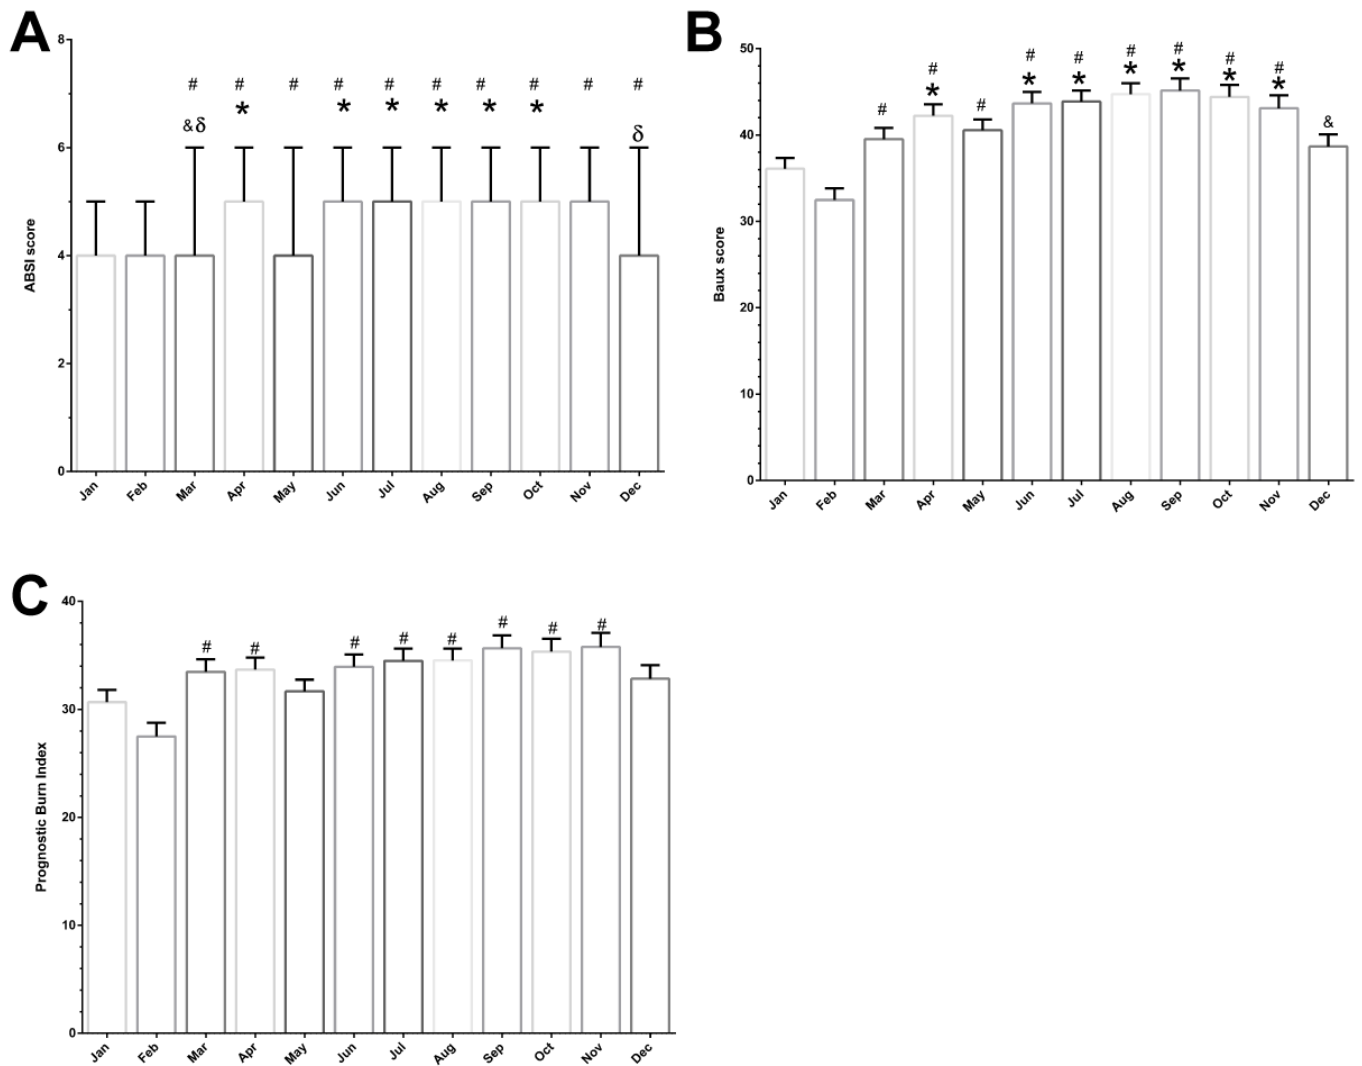

**Figure S1 Distributions of burn severity by month.**

A. ABSI; Kruskal-Wallis test. B. Baux scores; one-way ANOVA. C. Prognostic Burn Index; one-way ANOVA. \*compared with January,  $P < 0.05$ ; # compared with February,  $P < 0.05$ ; & compared with September,  $P < 0.05$ ; delta compared with August,  $P < 0.05$ ; ABSI: Abbreviated Burn Severity Index.

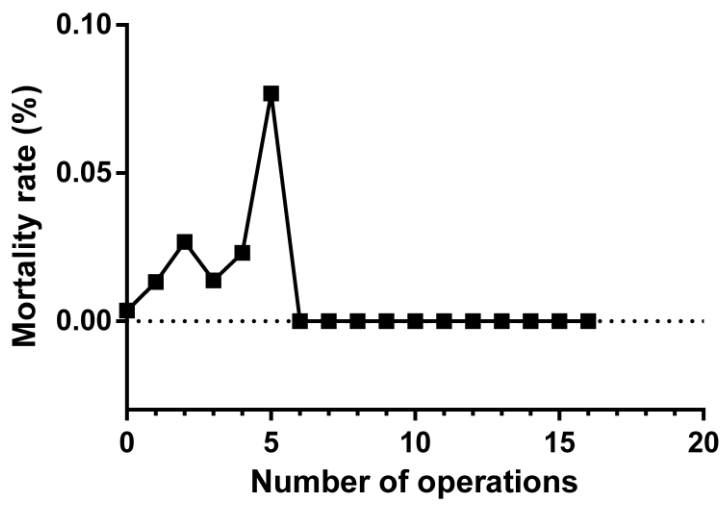

Figure S2 Distribution of mortality rate by the number of operations

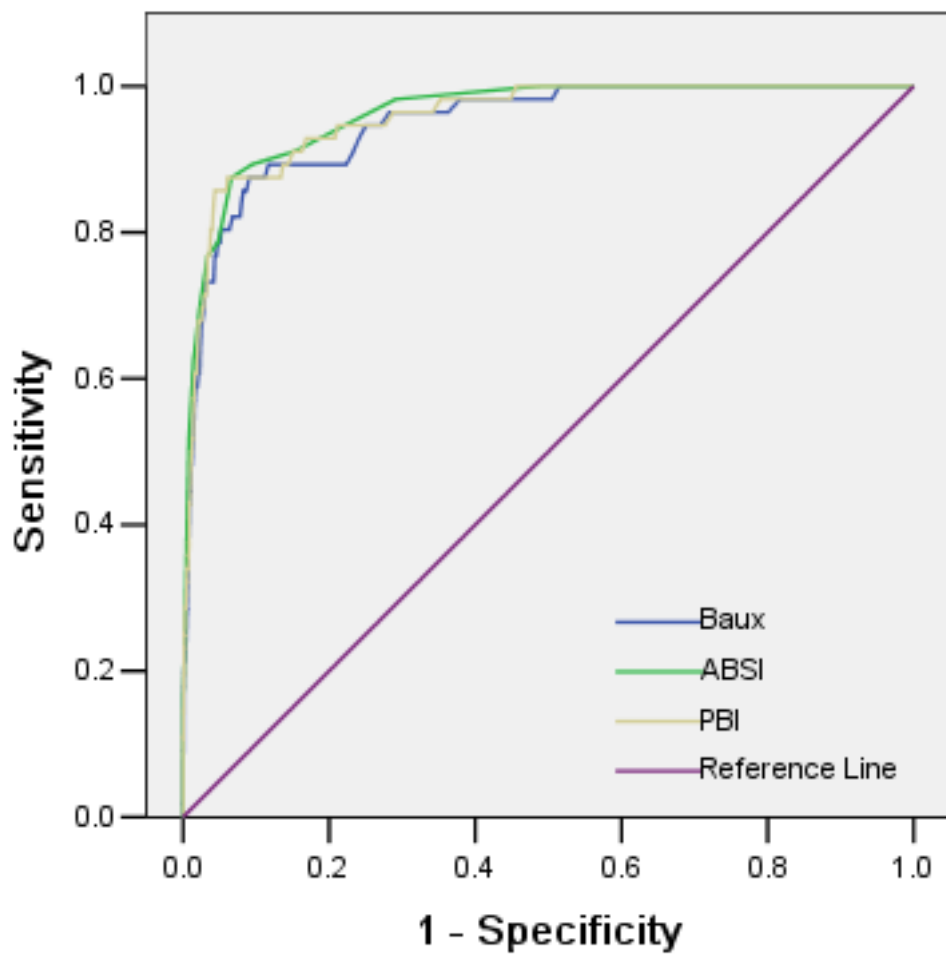

AUC of Baux score=0.948

AUC of ABSI=0.962

AUC of PBI=0.957

**Figure S3 Receiver operating characteristic curves and analysis of the area under the curve to predict mortality based on 6325 patients.**

## Supplementary Tables

**Table S1 Distribution of length of stay and mortality**

|                   | Length of stay (days) |           |                           | Mortality |                           |
|-------------------|-----------------------|-----------|---------------------------|-----------|---------------------------|
|                   | Median                | IQR       | Statistic, <i>P</i> value | N (%)     | Statistic, <i>P</i> value |
| Etiology          |                       |           | 559.8, <0.001             |           | 77.6, <0.001              |
| Scald             | 13                    | 8~23      |                           | 12(0.2)   |                           |
| Flame             | 20                    | 11~37     |                           | 25(1.2)   |                           |
| Contact           | 20                    | 12~39.5   |                           | 3(0.6)    |                           |
| Chemical          | 19                    | 8~38      |                           | 4(2.3)    |                           |
| Electricity       | 40                    | 20~66     |                           | 3(0.6)    |                           |
| Explosion         | 30                    | 11~54     |                           | 9(7.8)    |                           |
| Gender            |                       |           | 3877874, <0.001           |           | 7.5, 0.006                |
| Male              | 19                    | 10~35     |                           | 47(1.1)   |                           |
| Female            | 15                    | 9~28      |                           | 9(0.4)    |                           |
| Age (years)       |                       |           | 274.7, <0.001             |           | 29.7, <0.001              |
| 0~6               | 13                    | 8~23      |                           | 2(0.1)    |                           |
| 7~20              | 16                    | 9~31      |                           | 5(0.1)    |                           |
| 21~40             | 21                    | 12~42     |                           | 16(1.1)   |                           |
| 41~60             | 22                    | 12~43     |                           | 28(1.7)   |                           |
| 61~80             | 16                    | 8~28.3    |                           | 4(1.0)    |                           |
| 81~100            | 12.5                  | 5~20.8    |                           | 1(2.5)    |                           |
| Year              |                       |           | 9.6, 0.048                |           | 0.7, 0.945                |
| 2011              | 17                    | 9~33      |                           | 14(1.0)   |                           |
| 2012              | 18                    | 10~34     |                           | 11(0.9)   |                           |
| 2013              | 18                    | 10~34     |                           | 10(0.7)   |                           |
| 2014              | 18                    | 10~34     |                           | 13(1.0)   |                           |
| 2015              | 16                    | 9~30      |                           | 8(0.8)    |                           |
| Inhalation injury |                       |           | 619526, <0.001            |           | 179.4, <0.001             |
| Yes               | 40                    | 18.5~93.5 |                           | 27(7.4)   |                           |
| No                | 17                    | 9~31      |                           | 29(0.5)   |                           |
| Burn depth        |                       |           | 2732290, <0.001           |           | 79.5, <0.001              |
| Full              | 27                    | 15~52     |                           | 55(2.2)   |                           |
| Partial           | 13                    | 8~23      |                           | 1(0.03)   |                           |

IQR: interquartile range

**Table S2 Assignment and multicollinearity of collected factors in the linear regression analysis of length of stay**

| Risk factors         | Variables | Evaluation                               | <i>Tolerance</i> | <i>Variance Inflation Factor</i> |
|----------------------|-----------|------------------------------------------|------------------|----------------------------------|
| Length of stay       | Y         | Ln(length of stay), consecutive variable |                  |                                  |
| Gender               | X1        | Male=1, Female=0                         | 0.939            | 1.065                            |
| Age                  | X2        | Consecutive variable                     | 0.774            | 1.292                            |
| TBSA                 | X3        | Consecutive variable                     | 0.637            | 1.570                            |
| Full-thickness burns | X4        | No=0, Yes=1                              | 0.663            | 1.508                            |
| Inhalation injury    | X5        | No=0, Yes=1                              | 0.735            | 1.360                            |
| Number of operations | X6        | Consecutive variable                     | 0.590            | 1.696                            |
| Outcomes             | X7        | Death=0, invalid=1, improved=2, cured=3  | 0.909            | 1.100                            |
| Explosion burns      | X8        | Dummy variables, No=0, Yes=1             | 0.916            | 1.092                            |
| Flame burns          | X9        | Dummy variables, No=0, Yes=1             | 0.659            | 1.517                            |
| Chemical burns       | X10       | Dummy variables, No=0, Yes=1             | 0.927            | 1.079                            |
| Electrical burns     | X11       | Dummy variables, No=0, Yes=1             | 0.634            | 1.577                            |
| Contact burns        | X12       | Dummy variables, No=0, Yes=1             | 0.755            | 1.324                            |

**Table S3 Assignment and multicollinearity of collected factors in the logistic regression analysis of mortality**

| Risk factors         | Variables | Evaluation                                                                                                | Tolerance | Variance Inflation Factor |
|----------------------|-----------|-----------------------------------------------------------------------------------------------------------|-----------|---------------------------|
| Death                | Y         | No=0, Yes=1                                                                                               |           |                           |
| Gender               | X1        | Male=1, Female=0                                                                                          | 0.940     | 1.064                     |
| Age                  | X2        | 0~20 years=1, 21~40 years=2, 41~60 years=3,<br>61~80 years=4, 81~100 years=5                              | 0.819     | 1.221                     |
| TBSA                 | X3        | 0~10%=1, 11~20%=2, 21~30%=3, 31~40%=4,<br>41~50%=5, 51~60%=6, 61~70%=7, 71~80%=8,<br>81~90%=9, 91~100%=10 | 0.664     | 1.505                     |
| Full-thickness burns | X4        | No=0, Yes=1                                                                                               | 0.619     | 1.616                     |
| Inhalation injury    | X5        | No=0, Yes=1                                                                                               | 0.739     | 1.354                     |
| Number of operations | X6        | Consecutive variable                                                                                      | 0.626     | 1.598                     |
| Flame burns          | X7        | Dummy variables, No=0, Yes=1                                                                              | 0.689     | 1.451                     |
| Chemical burns       | X8        | Dummy variables, No=0, Yes=1                                                                              | 0.934     | 1.071                     |
| Electrical burns     | X9        | Dummy variables, No=0, Yes=1                                                                              | 0.647     | 1.547                     |
| Contact burns        | X10       | Dummy variables, No=0, Yes=1                                                                              | 0.774     | 1.292                     |
| Explosion burns      | X11       | Dummy variables, No=0, Yes=1                                                                              | 0.922     | 1.085                     |

**Table S4 Comparison between survivors and non-survivors**

|                            | Survivors       | Non-survivors   | <i>Statistic value</i> | <i>P</i> |
|----------------------------|-----------------|-----------------|------------------------|----------|
| Age (Years $\pm$ SD)       | 26.8 $\pm$ 0.3  | 41.1 $\pm$ 2.5  | 4.7                    | <0.001   |
| %TBSA                      |                 |                 | 29.0                   | <0.001   |
| Mean $\pm$ SD              | 12.8 $\pm$ 15.3 | 72.8 $\pm$ 28.1 |                        |          |
| Median, IQR                | 8,4~15          | 85,59~93.5      |                        |          |
| Inhalation injury, n(%)    | 338(5.4)        | 27(39.5)        | 179.4                  | <0.001   |
| Full-thickness burns, n(%) | 2481(39.6)      | 55(98.2)        | 77.0                   | <0.001   |
| Number of operations, n(%) |                 |                 | 72.2                   | <0.001   |
| 0                          | 3935 (99.6)     | 14 (0.4)        |                        |          |
| 1                          | 1348(98.7)      | 18(1.3)         |                        |          |
| 2                          | 473(97.3)       | 13(2.7)         |                        |          |
| 3                          | 216(98.6)       | 3(1.4)          |                        |          |
| 4                          | 127(97.7)       | 3(2.3)          |                        |          |
| 5                          | 60(92.3)        | 5(7.7)          |                        |          |
| 6~16                       | 110 (100)       | 0(0)            |                        |          |
| Median, IQR                | 0,0~1           | 1,0.25~2        | 102,460                | <0.001   |
| ABSI                       |                 |                 | 13,436                 | <0.001   |
| Median, IQR                | 4,3~6           | 14,11~15        |                        |          |
| Baux Score                 |                 |                 | 20.4                   | <0.001   |
| Median, IQR                | 38,14~57.5      | 128.5,100~144.8 |                        |          |
| Prognostic Burn Index      |                 |                 | 19.7                   | <0.001   |
| Median, IQR                | 32,6.5~50       | 102.3,85~121.1  |                        |          |

IQR: interquartile range



**Table S5 Co-morbidity distribution among the 56 deaths**

| Co-morbidity type                       | Number involved |
|-----------------------------------------|-----------------|
| Shock                                   | 9               |
| Sepsis                                  | 4               |
| Infection                               | 6               |
| Inhalation injury                       | 28              |
| Respiratory failure                     | 2               |
| Lung trauma                             | 4               |
| Chronic obstructive pulmonary disease   | 3               |
| Renal failure                           | 2               |
| Hypertension/<br>coronary heart disease | 4               |
